# Supplementary material
Source: PubMed Central journal article supplement (PMC3545067)
Supplement: NIHMS424369-supplement-Supp_FigureS1-S3.pdf [file NIHMS424369-supplement-Supp_FigureS1-S3.pdf]

## SUPPLEMENTARY INFORMATION

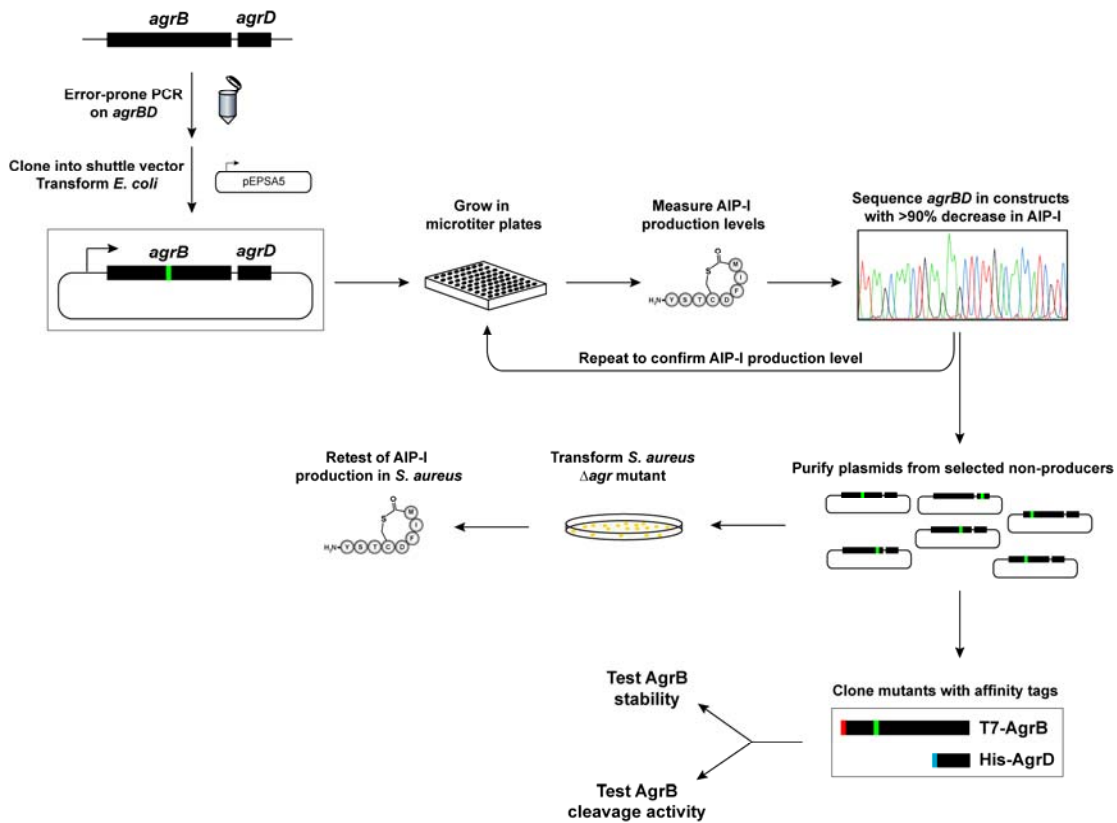

**Figure 1.** Schematic of the screen for identifying *agrBD* mutants. As outlined in the text, the *agrBD* genes were mutagenized by error-prone PCR and cloned onto *E. coli* – *S. aureus* shuttle vector pEPSA5. Spent media from the *E. coli* transformants was tested for AIP-I production using a *lux*-based *agr* activation bioassay with an *S. aureus* reporter strain. Transformants producing less than 10% bioluminescence were retested in the bioassay, and the mutagenized *agrBD* genes that confirmed in the retest were sequenced. After removing candidates with multiple or nonsense mutations, the pEPSA5-*agrBD* mutant plasmids were transformed into *S. aureus*  $\Delta agr$  strain (AH1292) for testing AIP-I production in the native host. In parallel, T7-AgrB and His6-AgrD constructs were built for testing AgrB cleavage activity.

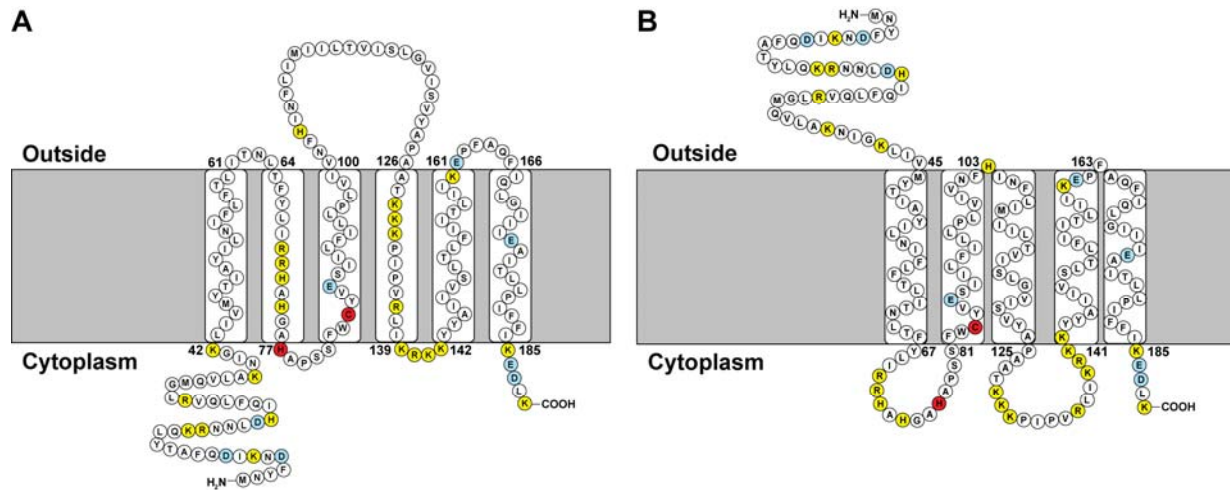

**Figure S2.** Topology maps of AgrB. **A**, The topology map reported by Zhang, et al. (Zhang et al., 2002) based on alkaline phosphatase fusions. **B**, AgrB topology as predicted by the topology analysis program TOPCONS (Bernsel et al., 2009). Positively charged residues are shaded yellow, negatively charged ones are blue. Red indicates the catalytic histidine and cysteine residues.

|                          |     |      |        |            |            |        |        |        |       |            |           |                     |     |
|--------------------------|-----|------|--------|------------|------------|--------|--------|--------|-------|------------|-----------|---------------------|-----|
|                          |     |      | 1      | 10         | 20         | 30     | 40     | 50     | 60    | 70         |           |                     |     |
| <i>S. aureus</i> type 1  | (1) | ---- | LNYFDN | KIQDFATY   | LQKRNLDHIQ | -FLQVR | LGQVLA | KNI    | IGKLI | VMTIAYILNI | FLFLITNLT | FYILRRH             |     |
| <i>S. aureus</i> type 2  | (1) | ---- | LNYFDN | KIQDFATY   | LQKRNLDHIQ | -FLQVR | LGQVLA | KNI    | IGKLI | VMTIAYILNI | FLFLITNLT | FYILRRH             |     |
| <i>S. aureus</i> type 3  | (1) | ---- | LNYFDN | KIQDFATY   | LQKRNLDHIQ | -FLQVR | LGQVLA | KNI    | IGKLI | VMTIAYILNI | FLFLITNLT | FYILRRH             |     |
| <i>S. aureus</i> type 4  | (1) | ---- | MNYFDN | KIQDFATY   | LQKRNLDHIQ | -FLQVR | LGQVLA | KNI    | IGKLI | VMTIAYILNI | FLFLITNLT | FYILRRH             |     |
| <i>S. capitis</i>        | (1) | ---- | MNIIDR | KIDEFANY   | LQKRNLDHIQ | -FLKVR | LGQVLA | KNI    | IGKLI | VMTIAYILNI | FLFLITNLT | FYILRRH             |     |
| <i>S. carnosus</i>       | (1) | ---- | MQVLER | KIDAWAQA   | LQKRNLDRIA | -YLIK  | IGLGV  | FNNL   | FRTI  | VVYGL      | LALFHV    | FLYTLTVHLSYFAIRHY   |     |
| <i>S. epidermidis</i>    | (1) | ---- | MKIIDK | KIEQFAQY   | LQKRNLDHIQ | -FLKIR | LGQVLA | KNI    | IGKLI | VMTIAYILNI | FLFLITNLT | FYILRRH             |     |
| <i>S. haemolyticus</i>   | (1) | ---- | MKAIDN | KIEQFALY   | LQKRNLDHIQ | -FLKVR | LGQVVA | SNLAKT | IVTV  | GVALIF     | HFTFLY    | TLTHTNISFYILRRY     |     |
| <i>S. intermedius</i>    | (1) | ---- | MLLDNG | IEKMLK     | LQQRNLSHIE | -FLKVR | LGQVVA | SNLAKT | IVTV  | GVALIF     | HFTFLY    | TLTHTNISFYILRRY     |     |
| <i>S. lugdunensis</i>    | (1) | ---- | LKAI   | DKKIERFARY | LQRNNLDHIQ | -FLKIR | IGQVAL | CNPF   | FKTI  | VTVGV      | ALLFHT    | FLYTLTHTLVTVFVRRF   |     |
| <i>S. warneri</i>        | (1) | ---- | MKIIDT | KIQDFANY   | LQKRNLDRIQ | -FLKVR | LGQVVA | SNLAKT | IVTV  | GVALIF     | HFTFLY    | TLTHTNISFYILRRY     |     |
| <i>C. acetobutylicum</i> | (1) | ---  | MKGKSS | VMEKLA     | EVVSKLNKHL | KMEGIE | -LIR   | LKLG   | VEI   | I          | FINIS     | KLAILFLVSYFFGLIKETI |     |
| <i>C. beijerinckii</i>   | (1) | ---  | MEVDL  | SKKAL      | SEI        | IAKL   | VAKIN  | RDN    | QLD   | NVN        | -YK       | MMYGL               | VEI |
| <i>C. botulinum</i>      | (1) | ---  | MKLSE  | KFSIK      | VNTY       | IKK    | TL     | PNK    | TE    | ED         | LQI       | IKY                 | GV  |
| <i>C. butyricum</i>      | (1) | ---  | MKNKI  | QISF       | MER        | LAETI  | VNN    | MNS    | YLH   | KE         | GLE       | -IQ                 | KL  |
| <i>C. cellulolyticum</i> | (1) | ---  | MLEVI  | TKK        | IT         | NE     | IV     | LV     | NP    | G          | ITE       | KA                  | E   |
| <i>C. difficile</i> 1    | (1) | ---  | MFKRY  | AEK        | M          | T      | S      | V      | L     | C          | N         | M                   | D   |
| <i>C. difficile</i> 2    | (1) | ---  | MFKRL  | S          | Y          | K      | F      | A      | N     | I          | V         | N                   | E   |
| <i>C. novyi</i>          | (1) | ---  | MKLSE  | KFSIK      | VNTY       | IKK    | TL     | PNK    | TE    | ED         | LQI       | IKY                 | GV  |
| <i>C. thermocellum</i>   | (1) | ---  | MPLL   | K          | K          | C      | E      | N      | T     | N          | V         | K                   | E   |
| <i>L. grayii</i>         | (1) | ---  | MSNYS  | PNV        | PL         | SAR    | LA     | E      | K     | I          | T         | K                   | R   |
| <i>L. innocua</i>        | (1) | ---  | MSNFT  | A          | K          | V      | L      | S      | E     | R          | M         | A                   | D   |
| <i>L. monocytogenes</i>  | (1) | ---  | LSNFT  | A          | K          | V      | L      | S      | E     | R          | M         | A                   | D   |
| <i>L. seeligeri</i>      | (1) | ---  | MSNFT  | A          | K          | V      | L      | S      | E     | R          | M         | A                   | D   |
| <i>L. welshimeri</i>     | (1) | ---  | MSNFT  | V          | K          | V      | L      | S      | E     | R          | M         | A                   | D   |

  

|                          |      |     |     |      |      |       |      |     |     |
|--------------------------|------|-----|-----|------|------|-------|------|-----|-----|
|                          |      |     | 80  | 90   | 100  | 110   | 120  | 130 | 140 |
| <i>S. aureus</i> type 1  | (73) | AG  | GAH | APSS | FWCY | VESI  | ILE  | ILL | PLV |
| <i>S. aureus</i> type 2  | (73) | AG  | GAH | AKSS | ILCY | IQSIL | TE   | VFV | FL  |
| <i>S. aureus</i> type 3  | (73) | AG  | GAH | APSS | FWCY | IESIT | LE   | IVL | LLV |
| <i>S. aureus</i> type 4  | (73) | AG  | GAH | APSS | FWCY | IESIF | LE   | IVL | LLV |
| <i>S. capitis</i>        | (73) | AG  | GAH | AKSS | LLCH | IQNI  | ILE  | IFL | PP  |
| <i>S. carnosus</i>       | (74) | AG  | GAH | AKST | FA   | CY    | IESI | LE  | IVL |
| <i>S. epidermidis</i>    | (73) | AG  | HT  | ANSS | LLCH | IQNI  | IFL  | IF  | PP  |
| <i>S. haemolyticus</i>   | (73) | AG  | GAH | AKSS | LLCH | VQNL  | AL   | VAL | P   |
| <i>S. intermedius</i>    | (73) | SH  | GAH | AKT  | SM   | LCH   | VQNL | IV  | F   |
| <i>S. lugdunensis</i>    | (73) | AG  | GAH | AKSS | LLCH | IQNL  | V    | L   | V   |
| <i>S. warneri</i>        | (73) | AG  | GAH | AKSS | LLCH | IQNI  | IFL  | IF  | PP  |
| <i>C. acetobutylicum</i> | (77) | AF  | GL  | HAK  | NS   | I     | V    | C   | T   |
| <i>C. beijerinckii</i>   | (80) | AF  | GI  | HAK  | NS   | I     | S    | C   | T   |
| <i>C. botulinum</i>      | (74) | AAG | I   | HAK  | S    | Y     | T    | C   | L   |
| <i>C. butyricum</i>      | (79) | T   | F   | GL   | HAK  | S     | F    | I   | C   |
| <i>C. cellulolyticum</i> | (72) | L   | G   | V    | HAK  | T     | Q    | I   | G   |
| <i>C. difficile</i> 1    | (71) | S   | G   | V    | HAK  | N     | Y    | K   | E   |
| <i>C. difficile</i> 2    | (71) | T   | G   | V    | HAK  | N     | Y    | K   | E   |
| <i>C. novyi</i>          | (74) | AAG | I   | HAK  | S    | Y     | T    | C   | L   |
| <i>C. thermocellum</i>   | (74) | AG  | G   | S    | HAK  | T     | F    | W   | G   |
| <i>L. grayii</i>         | (78) | S   | F   | L    | HAK  | T     | K    | S   | W   |
| <i>L. innocua</i>        | (78) | S   | F   | L    | HAK  | T     | K    | S   | W   |
| <i>L. monocytogenes</i>  | (78) | S   | F   | L    | HAK  | T     | K    | S   | W   |
| <i>L. seeligeri</i>      | (78) | S   | F   | L    | HAK  | T     | K    | S   | W   |
| <i>L. welshimeri</i>     | (78) | S   | F   | L    | HAK  | T     | K    | S   | W   |

  

|                          |       |     |     |     |     |     |
|--------------------------|-------|-----|-----|-----|-----|-----|
|                          |       |     | 150 | 160 | 170 | 180 |
| <i>S. aureus</i> type 1  | (149) | SL  | TL  | FI  | IT  | LI  |
| <i>S. aureus</i> type 2  | (149) | YLL | V   | L   | S   | L   |
| <i>S. aureus</i> type 3  | (149) | ST  | L   | F   | I   | T   |
| <i>S. aureus</i> type 4  | (149) | SL  | I   | F   | I   | T   |
| <i>S. capitis</i>        | (149) | Y   | C   | F   | I   | V   |
| <i>S. carnosus</i>       | (150) | A   | G   | I   | L   | I   |
| <i>S. epidermidis</i>    | (149) | Y   | C   | T   | I   | V   |
| <i>S. haemolyticus</i>   | (149) | T   | M   | V   | L   | I   |
| <i>S. intermedius</i>    | (149) | F   | V   | L   | M   | T   |
| <i>S. lugdunensis</i>    | (149) | S   | I   | C   | F   | L   |
| <i>S. warneri</i>        | (149) | Y   | M   | L   | V   | I   |
| <i>C. acetobutylicum</i> | (155) | M   | L   | L   | M   | A   |
| <i>C. beijerinckii</i>   | (158) | S   | I   | M   | T   | L   |
| <i>C. botulinum</i>      | (152) | T   | L   | F   | L   | S   |
| <i>C. butyricum</i>      | (157) | L   | I   | L   | M   | I   |
| <i>C. cellulolyticum</i> | (148) | L   | V   | I   | C   | F   |
| <i>C. difficile</i> 1    | (151) | V   | L   | L   | T   | I   |
| <i>C. difficile</i> 2    | (151) | V   | I   | C   | L   | I   |
| <i>C. novyi</i>          | (152) | I   | L   | F   | L   | S   |
| <i>C. thermocellum</i>   | (154) | I   | A   | E   | L   | S   |
| <i>L. grayii</i>         | (156) | L   | L   | T   | G   | I   |
| <i>L. innocua</i>        | (156) | L   | L   | T   | G   | I   |
| <i>L. monocytogenes</i>  | (156) | L   | L   | T   | G   | I   |
| <i>L. seeligeri</i>      | (156) | L   | L   | T   | G   | I   |
| <i>L. welshimeri</i>     | (156) | L   | L   | T   | G   | I   |

**Figure S3.** Sequence alignments of AgrB. All known AgrB sequences from *Staphylococcus*, *Clostridium* and *Listeria* species were aligned using Vector NTI Advance 11.0 AlignX software (Invitrogen). Residues that are completely conserved in all species are boxed in gray and residues conserved in *Staphylococcus* species are boxed in yellow. Residues where mutations were found to decrease AIP production are bolded in red.
