# Supplementary material
Source: PubMed Central journal article supplement (PMC3545067)
Supplement: NIHMS424369-supplement-Supp_TableS1.pdf [file NIHMS424369-supplement-Supp_TableS1.pdf]

**Supplemental Table S1. Additional oligonucleotides used in this study**

| <b>Oligonucleotide</b>             | <b>Sequence</b>                     | <b>Description</b> |
|------------------------------------|-------------------------------------|--------------------|
| <b>AgrB Cysteine Substitutions</b> |                                     |                    |
| MJT192                             | 5'-ATTATCAAAATAACACGGATCCCGACC-3'   | AgrB N2C rev       |
| MJT193                             | 5'-GGTCGGGATCCGTGTTATTTTGATAAT-3'   | AgrB N2C for       |
| MJT147                             | 5'-TTGAAGATACGTACAAAACCTGGTCAAT -3' | AgrB A12C rev      |
| MJT148                             | 5'-ATTGACCAGTTTTGTACGTATCTTCAA-3'   | AgrB A12C for      |
| MJT194                             | 5'-TTGAATATGATCACAGTTATTTCTCTT-3'   | AgrB L21C rev      |
| MJT195                             | 5'-AAGAGAAATAACTGTGATCATATTCAA-3'   | AgrB L21C for      |
| MJT171                             | 5'-TACCTATATTTTTACATAAGACCTGCAT-3'  | AgrB A37C rev      |
| MJT154                             | 5'-ATGCAGGTCTTATGTAAAAATATAGGT-3'   | AgrB A37C for      |
| MJT182                             | 5'-CAGAAAAATGTTACAAATATAGGCAAT-3'   | AgrB L53C rev      |
| MJT183                             | 5'-ATTGCCTATATTTGTAACATTTTTCTG-3'   | AgrB L53C for      |
| MJT155                             | 5'-TAAATAAAATGTACAATTCGTAATTAA-3'   | AgrB L64C rev      |
| MJT156                             | 5'-TTAATTACGAATTGTACATTTTATTTA-3'   | AgrB L64C for      |
| MJT157                             | 5'-ATGTGCACCATGACAATGTCTTCTTAT-3'   | AgrB A73C rev      |
| MJT158                             | 5'-ATAAGAAGACATTTGTCATGGTGCACAT-3'  | AgrB A73C for      |
| MJT159                             | 5'-CCAAAAAGAACAAGGTGCATGTGC-3'      | AgrB S80C rev      |
| MJT160                             | 5'-GCACATGCACCTTGTCTTTTTTGG-3'      | AgrB S80C for      |
| MJT161                             | 5'-GTTAATATGAAAACATACTATTACTAA-3'   | AgrB N101C rev     |
| MJT162                             | 5'-TTAGTAATAGTATGTTTTTCATATTAAC-3'  | AgrB N101C for     |
| MJT196                             | 5'-TAAAAAGTTAATACAAAATTTACTAT-3'    | AgrB H103C rev     |
| MJT197                             | 5'-ATAGTAAATTTTTGTATTAACTTTTTA-3'   | AgrB H103C for     |
| MJT174                             | 5'-AATTA AAAAGTTACAATGAAAATTTAC-3'  | AgrB I104C rev     |
| MJT175                             | 5'-GTAAATTTTCATTTGTAACTTTTTAATT-3'  | AgrB I104C for     |
| MJT163                             | 5'-ACCTAAAGAAATACATGTTAAAATAAT -3'  | AgrB V114C rev     |
| MJT164                             | 5'-ATTATTTTAAACATGTTATTTCTTTAGGT-3' | AgrB V114C for     |
| MJT149                             | 5'-CTTTTTAGTTGCACAAGGAGCATATAC-3'   | AgrB A126C rev     |
| MJT150                             | 5'-GTATATGCTCCTTGTGCAACTAAAAAG-3'   | AgrB A126C for     |

|        |                                                |                |
|--------|------------------------------------------------|----------------|
| MJT198 | 5'-GGGCTTCTTTTT <b>AC</b> ATGCTGCAGGAGC-3'     | AgrB T128C rev |
| MJT199 | 5'-GCTCCTGCAGCAT <b>GT</b> AAAAAGAAGCCC-3'     | AgrB T128C for |
| MJT165 | 5'-AAGTCGCACAGG <b>AC</b> AGGGCTTCTTTTT-3'     | AgrB I133C rev |
| MJT166 | 5'-AAAAAGAAGCC <b>CTGT</b> CCTGTGCGACTT-3'     | AgrB I133C for |
| MJT200 | 5'-TTTAATAAGTC <b>GACA</b> AAGGAATGGGCTT-3'    | AgrB V135C rev |
| MJT201 | 5'-AAGCCATT <b>CTTGT</b> CGACTTATTA-3'         | AgrB V135C for |
| MJT176 | 5'-TTTTCGTTTA <b>ATAC</b> ATCGCACAGGAAT -3'    | AgrB L137C rev |
| MJT177 | 5'-ATTCCTGTGCG <b>ATGT</b> ATTAAACGAAAA-3'     | AgrB L137C for |
| MJT167 | 5'-AATCGCATAATA <b>AC</b> ATTTTCGTTTAAT-3'     | AgrB K142C rev |
| MJT168 | 5'-ATTAAACGAAA <b>ATGT</b> TATTATGCGATT-3'     | AgrB K142C for |
| MJT184 | 5'-GAATTGGG <b>CAAAAC</b> ACTCTTTGATGAT-3'     | AgrB P162C rev |
| MJT185 | 5'-ATCATCAAAG <b>AGTGT</b> TTTTGCCCAATTC-3'    | AgrB P162C for |
| MJT151 | 5'-TTGAATGAATT <b>GAC</b> AAAATGGCTCTTT-3'     | AgrB A164C rev |
| MJT152 | 5'-AAAGAGCCATTT <b>GT</b> CAATTCATTCAA-3'      | AgrB A164C for |
| MJT202 | 5'-TATTATGATGCC <b>AC</b> ATTGAATGAATTG-3'     | AgrB L169C rev |
| MJT203 | 5'-CAATTCATT <b>CAATGT</b> GGCATCATAATA-3'     | AgrB L169C for |
| MJT178 | 5'-TAATAATGTA <b>ATAC</b> ATTCTATTATGAT-3'     | AgrB A175C rev |
| MJT179 | 5'-ATCATAATAG <b>AAATGT</b> ATTACATTATTA-3'    | AgrB A175C for |
| MJT204 | 5'-CTTAATAAAG <b>AAACA</b> AGGTAATAATGT-3'     | AgrB I181C rev |
| MJT205 | 5'-ACATTATTAC <b>CTTGT</b> TTTCTTTATTAAG-3'    | AgrB I181C for |
| MJT169 | 5'-CTCGAGTCAT <b>TAC</b> AGTCCTCCTTAAT-3'      | AgrB L188C rev |
| MJT170 | 5'-ATTAAGGAG <b>ACTGT</b> AAATGACTCGAG-3'      | AgrB L188C for |
| MJT180 | 5'-AGACTCGAGT <b>CAAC</b> ATTTTAAGTCCTCCTT-3'  | AgrB 190C rev  |
| MJT181 | 5'-GAGGACTTAA <b>AAATGT</b> TGACTCGAGTCTGGT-3' | AgrB 190C for  |

#### Site-directed mutations

|        |                                            |                |
|--------|--------------------------------------------|----------------|
| MJT228 | 5'-CACAGGAATGGGG <b>G</b> CCTTTTTAGTTGC-3' | AgrB K131A rev |
| MJT229 | 5'-GCAACTAAA <b>AGGCC</b> CCCCATTCCTGTG-3' | AgrB K131A for |
| MJT230 | 5'-AGGAATGGG <b>CTTTT</b> CTTTAGTTGCTGC-3' | AgrB K130E rev |
| MJT231 | 5'-GCAGCAACTAA <b>AGAAA</b> AGCCCATTCCT-3' | AgrB K130E for |

|        |                                             |                |
|--------|---------------------------------------------|----------------|
| MJT232 | 5'-AGGAATGGGCTT <b>GG</b> CTTTAGTTGCTGC-3'  | AgrB K130A rev |
| MJT233 | 5'-GCAGCAACTAAAG <b>CCA</b> AGCCCATTCCCT-3' | AgrB K130A for |
| MJT234 | 5'-AATGGGCTTCTTT <b>TTC</b> AGTTGCTGCAGG-3' | AgrB K129E rev |
| MJT235 | 5'-CCTGCAGCAACT <b>GAAA</b> AGAAGCCCATT-3'  | AgrB K129E for |
| MJT236 | 5'-AATGGGCTTCTT <b>GGC</b> AGTTGCTGCAGG-3'  | AgrB K129A rev |
| MJT237 | 5'-CCTGCAGCAACT <b>GCCA</b> AGAAGCCCATT-3'  | AgrB K129A for |
